# Supplementary material
Source: MDPI journal article supplement (https://www.mdpi.com/2073-4468/12/3/54)
Supplement: s1 [file s1]

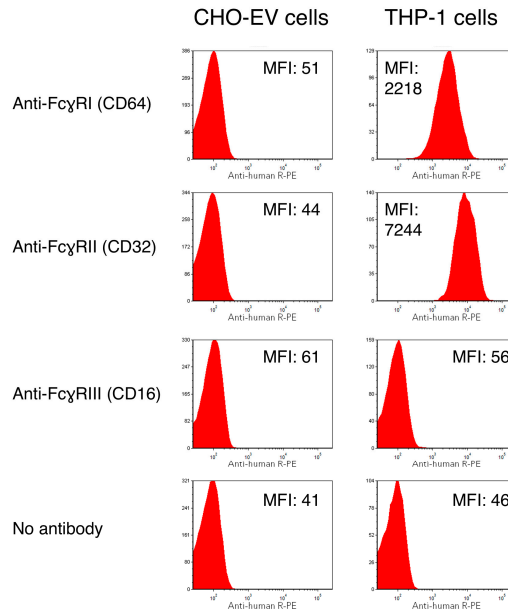

**Figure S1.** Profiling cell surface expression of FcγRI and FcγRII on THP-1 cells. Anti-FcγRI (CD64) clone 10.1 (BD Biosciences), anti-FcγRII (CD32) clone IV.3, and anti-FcγRIII (CD16) clone 3G8 were used to label the empty vector transfected CHO cells (CHO-EV) and THP-1 cells.

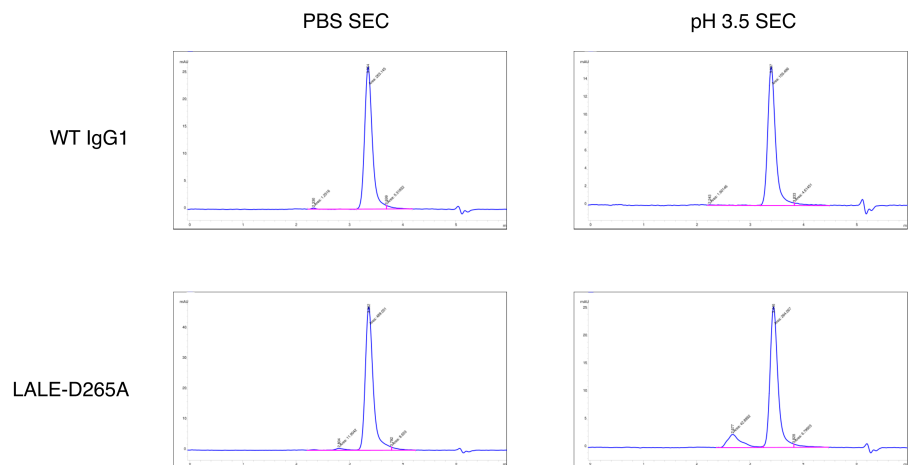

**Figure S2.** Representative SEC profiles for WT IgG1 and LALE-D265A variants under standard (PBS) and pH 3.5 conditions.

**Table S1.** Octet BLI characterization of the binding of the lower hinge panel to Cy CD3δ $\epsilon$ .

| IgG1 Hinge Mutations | Cy CD3δ $\epsilon$ Fc (RU) |
|----------------------|----------------------------|
| WT IgG1              | 0.47                       |
| L234A/L235A (LALA)   | 0.55                       |
| L234F/L235E (LFLE)   | 0.55                       |
| L234A/L235E (LALE)   | 0.56                       |

|                            |      |
|----------------------------|------|
| L235A/G237A (LAGA1)        | 0.53 |
| L234A/G237A (LAGA2)        | 0.52 |
| L234A/L235A/G237A (LALAGA) | 0.55 |
| L234A/L235K (LALK)         | 0.53 |
| L234F/L235K (LFLK)         | 0.56 |
| L234E/L235K (LELK)         | 0.59 |
| WT IgG2                    | 0.51 |

**Table S2.** Octet BLI characterization of the binding of the lower hinge CH2 mutation combination panel to ProA, Hu CD3δ $\epsilon$ , and Cy CD3δ $\epsilon$ .

| IgG1 Hinge x CH2<br>Mutations | Octet Kinetics |                               |                               |
|-------------------------------|----------------|-------------------------------|-------------------------------|
|                               | ProA<br>(RU)   | Hu CD3δ $\epsilon$ Fc<br>(RU) | Cy CD3δ $\epsilon$ Fc<br>(RU) |
| N/A                           | 4.6            | 0.52                          | 0.45                          |
| LALA                          | 4.9            | 0.59                          | 0.54                          |
| LALA-D265A                    | 4.7            | 0.51                          | 0.59                          |
| LALA-S267K                    | 4.9            | 0.45                          | 0.57                          |
| LALA-H268Q                    | 4.8            | 0.51                          | 0.59                          |
| LALA-D270A                    | 5.0            | 0.43                          | 0.57                          |
| LALA-L309A                    | 4.8            | 0.45                          | 0.59                          |
| LALA-L309V                    | 4.6            | 0.45                          | 0.60                          |
| LALA-K322A                    | 4.8            | 0.44                          | 0.55                          |
| LALA-A327G                    | 4.7            | 0.54                          | 0.57                          |
| LALA-L328A                    | 4.9            | 0.59                          | 0.59                          |
| LALA-P329A                    | 4.9            | 0.56                          | 0.61                          |
| LALA-P329G                    | 4.8            | 0.53                          | 0.60                          |
| LALA-Y296F                    | 4.9            | 0.47                          | 0.59                          |
| LALA-A330S                    | 5.0            | 0.56                          | 0.59                          |
| LALA-P331S                    | 5.0            | 0.57                          | 0.61                          |
| LALA-A330S/P331S              | 4.7            | 0.53                          | 0.58                          |
| LALE                          | 5.1            | 0.56                          | 0.50                          |
| LALE-D265A                    | 4.8            | 0.59                          | 0.63                          |
| LALE-S267K                    | 4.8            | 0.55                          | 0.49                          |
| LALE-H268Q                    | 5.1            | 0.52                          | 0.48                          |
| LALE-D270A                    | 4.9            | 0.52                          | 0.48                          |
| LALE-L309A                    | 4.7            | 0.53                          | 0.49                          |
| LALE-L309V                    | 0.0            | 0.56                          | 0.51                          |
| LALE-K322A                    | 4.6            | 0.53                          | 0.51                          |
| LALE-L328A                    | 4.7            | 0.55                          | 0.49                          |
| LALE-P329G                    | 5.0            | 0.55                          | 0.49                          |
| LALE-P329A                    | 4.9            | 0.57                          | 0.52                          |
| LALE-A330S                    | 5.1            | 0.54                          | 0.48                          |
| LALE-P331S                    | 5.1            | 0.55                          | 0.47                          |
| LALE-A330S/P331S              | 5.0            | 0.58                          | 0.51                          |
| LALAGA-P329G                  | 5.0            | 0.56                          | 0.43                          |
